# Supplementary material for: HDAC9-mediated epithelial cell cycle arrest in G2/M contributes to kidney fibrosis in male mice
Source: PubMed Central journal article supplement (PMC10212923; doi:10.1038/s41467-023-38771-4), 2023-05-25
Supplement: 41467_2023_38771_MOESM1_ESM.pdf [file 41467_2023_38771_MOESM1_ESM.pdf]

## Supplementary materials

### HDAC9-mediated epithelial cell cycle arrest in G2/M contributes to kidney fibrosis in male mice

Yang Zhang<sup>1</sup>, Yujie Yang<sup>1</sup>, Fan Yang<sup>2</sup>, Xiaohan Liu<sup>1</sup>, Ping Zhan<sup>1</sup>, Jichao Wu<sup>1</sup>, Xiaojie Wang<sup>1</sup>, Ziyang Wang<sup>1</sup>, Wei Tang<sup>1</sup>, Yu Sun<sup>1</sup>, Yan Zhang<sup>1</sup>, Qianqian Xu<sup>3</sup>, Jin Shang<sup>4</sup>, Junhui Zhen<sup>5</sup>, Min Liu<sup>\*1</sup>, Fan Yi<sup>\*1</sup>

<sup>1</sup>The Key Laboratory of Infection and Immunity of Shandong Province, Department of Pharmacology, School of Basic Medical Sciences, Shandong University, Jinan, 250012, China.

<sup>2</sup>Department of Neurosurgery, Provincial Hospital Affiliated to Shandong First Medical University, Jinan, 250021, China.

<sup>3</sup>Department of Organ Transplantation, Qilu Hospital of Shandong University, Jinan, 250012, China.

<sup>4</sup>Department of Nephrology, the First Affiliated Hospital of Zhengzhou University, Zhengzhou, 450052, China.

<sup>5</sup>Department of Pathology, School of Basic Medical Sciences, Shandong University, Jinan, 250012, China.

#### **\*Corresponding Author:**

Fan Yi, The Key Laboratory of Infection and Immunity of Shandong Province, Department of Pharmacology, School of Basic Medical Sciences, Shandong University, Jinan, 250012, China. Email: fanyi@sdu.edu.cn;

Min Liu, The Key Laboratory of Infection and Immunity of Shandong Province, Department of Pharmacology, School of Basic Medical Sciences, Shandong University, Jinan, 250012, China. Email: liuweimin@sdu.edu.cn.

**Running Title:** HDAC9 deficiency attenuated kidney fibrosis

## Inventory of supplementary materials

### I. Supplementary tables

**Table S1.** Clinical characteristics in the normal human control subjects or subjects with chronic kidney disease.

**Table S2.** Physical and biochemical parameters of mice with *HDAC9* deficiency.

**Table S3.** Physical and biochemical parameters of mice with *HDAC9* deficiency in tubules.

**Table S4.** Primer pairs of target genes used for PCR in this study.

**Table S5.** Antibodies used in this study.

### II. Supplementary figures

**Supplementary Figure S1.** HDAC9 was significantly increased in tubular epithelial cells.

**Supplementary Figure S2.** Establishment of *HDAC9* knockout (*HDAC9*<sup>-/-</sup>) mice.

**Supplementary Figure S3.** *HDAC9* deficiency attenuated kidney fibrosis.

**Supplementary Figure S4.** Establishment of tubule-specific *HDAC9* knockout (*Cre*<sup>+</sup>/*HDAC9*<sup>fl/fl</sup>) mice.

**Supplementary Figure S5.** *HDAC9* knockdown reduced the expression of markers associated with fibrosis and proinflammatory mediators in HK-2 with TGF-β1 treatment.

**Supplementary Figure S6.** *HDAC9* deficiency inhibited tubular epithelial cell G2/M arrest.

**Supplementary Figure S7.** HDAC9 contributed to epithelial cell cycle arrest in G2/M and activation of fibroblasts.

**Supplementary Figure S8.** *HDAC9* upregulated the expression of TGF-β1, CTGF and p21.

**Supplementary Figure S9.** STAT1 was involved in HDAC9-mediated fibrotic effect.

**Supplementary Figure S10.** Tubule-specific deletion of *HDAC9* reduced the expression of Vimentin and α-SMA.

**Supplementary Figure S11.** TMP195 attenuated kidney fibrosis and inhibited G2/M phase arrest in TECs.

**Supplementary Figure S12.** DNMT3a was increased in fibrotic kidneys and HK-2 with AA or TGF-β1 treatment.

## Supplementary tables

**Table S1. Clinical characteristics in the normal human control subjects or subjects with chronic kidney disease.**

| Normal group (n = 6)                  |                                                |
|---------------------------------------|------------------------------------------------|
| Age (years)                           | 50.17±4.97                                     |
| Gender (male, n, %)                   | 2 (33.33%)                                     |
| SCr (μmol/l)                          | 64.33±4.72                                     |
| BUN (mmol/l)                          | 4.92±0.56                                      |
| eGFR (ml/min/1.73 m <sup>2</sup> )    | 75.14±4.28                                     |
| Subjects with renal fibrosis (n = 17) |                                                |
| Age (years)                           | 50.47±2.72                                     |
| Gender (male, n, %)                   | 13 (76.47%)                                    |
| SCr (μmol/l)                          | 158.06±10.15 ( <i>p</i> < 0.0001) <sup>#</sup> |
| BUN (mmol/l)                          | 11.50±1.78 ( <i>p</i> = 0.0214)*               |
| eGFR (ml/min/1.73 m <sup>2</sup> )    | 33.45±2.23 ( <i>p</i> < 0.0001)*               |
| Pathological diagnosis                | N (%)                                          |
| Focal segmental glomerulosclerosis    | 9 (52.94%)                                     |
| IgA nephropathy                       | 5 (29.41%)                                     |
| Diabetic nephropathy                  | 3 (17.65%)                                     |

SCr, serum creatinine; BUN, blood urea nitrogen; eGFR, estimated glomerular filtration rate; # Mann-Whitney rank sum test with two-tailed *p*-value; \* Unpaired t-test with two-tailed *p*-value; SEM, Standard error of mean; Data are expressed as mean ± SEM.

**Table S2. Physical and biochemical parameters of mice with *HDAC9* deficiency.**

| Variables             |           | <i>HDAC9</i> <sup>+/+</sup> | <i>HDAC9</i> <sup>-/-</sup> |
|-----------------------|-----------|-----------------------------|-----------------------------|
| Body weight (g)       |           | 26.25 ±0.94                 | 26.37±0.59                  |
| kidney weight (g)     |           | 0.26±0.01                   | 0.26±0.02                   |
| Heart rate (beat/min) |           | 490.56±14.40                | 496.89±17.36                |
| Blood pressure (mmHg) | Systolic  | 112.11±2.98                 | 110.84±2.77                 |
|                       | Diastolic | 72.28±3.13                  | 71.45±2.75                  |
| Scr (μmol/l)          |           | 9.65±0.64                   | 9.08±0.73                   |
| BUN (mmol/l)          |           | 8.74±0.41                   | 8.98±0.49                   |

n = 6 mice per group. Data are expressed as mean ± SEM

**Table S3. Physical and biochemical parameters of mice with *HDAC9* deficiency in tubules.**

| Variables             |           | <i>Cre</i> <sup>-</sup> / <i>HDAC9</i> <sup>fl/fl</sup> | <i>Cre</i> <sup>+</sup> / <i>HDAC9</i> <sup>fl/fl</sup> |
|-----------------------|-----------|---------------------------------------------------------|---------------------------------------------------------|
| Body weight (g)       |           | 26.05 ±0.76                                             | 26.22±0.81                                              |
| kidney weight (g)     |           | 0.25±0.02                                               | 0.26±0.01                                               |
| Heart rate (beat/min) |           | 487.00±20.08                                            | 490.78±17.48                                            |
| Blood pressure (mmHg) | Systolic  | 111.39±4.29                                             | 112.44±2.86                                             |
|                       | Diastolic | 72.00±2.99                                              | 72.39±2.23                                              |
| Scr (μmol/l)          |           | 9.32±0.52                                               | 8.95±0.67                                               |
| BUN (mmol/l)          |           | 9.01±0.51                                               | 8.83±0.73                                               |

n = 6 mice per group. Data are expressed as mean ± SEM

**Table S4. Primer pairs of target genes used for PCR in this study.**

| Gene                          | Species | Forward (5' to 3')          |                            | Reverse (5' to 3')            |                             |
|-------------------------------|---------|-----------------------------|----------------------------|-------------------------------|-----------------------------|
| Global <i>HDAC9</i> knockout  | Mouse   | P1                          | CCCCAAATTACCT<br>CGCACCTTA | P2                            | CCTCCCGGATTCCAC<br>TTGTT    |
|                               |         | P3                          | CGTGGGCCGTCT<br>CTGTCTTG   | P4                            | CCCTGGTGCCTCTTA<br>CTTTCTCG |
| <i>HDAC9</i> <sup>fl/fl</sup> | Mouse   | AAGCAGCACGAGAAT<br>TTGAC    |                            | CTAAGGAAGAACTACATT<br>GCCCTAT |                             |
| <i>Cdh16-Cre</i>              | Mouse   | P1                          | GCAGATCTGGCT<br>CTCCAAAG   | P2                            | AGGCAAATTTTGGT<br>GTACGG    |
|                               |         | P3                          | CAAATGTTGCTT<br>GTCTGGTG   | P4                            | GTCAGTCGAGTGCA<br>CAGTTT    |
| <i>HDAC9</i>                  | Mouse   | AGTGCGAGACACAGA<br>TGCTC    |                            | TACATGAACGTGGCTGGA<br>GG      |                             |
| <i>p21</i>                    | Mouse   | TTGTGCTGTCTTGCA<br>CTCT     |                            | TAGAAATCTGTCAGGCTG<br>GTCT    |                             |
| <i>β-actin</i>                | Mouse   | GGCTGTATTCCCCTCC<br>ATCG    |                            | CCAGTTGGTAACAATGCC<br>ATGT    |                             |
| <i>HDAC9</i>                  | Human   | CTCATGCCGAGCAAAT<br>GGTT    |                            | GGAACACCTTGCCTAAGC<br>GT      |                             |
| <i>CTGF</i>                   | Human   | TTAGCGTGCTCACTGA<br>CCTG    |                            | GCCACAAGCTGTCCAGTC<br>TA      |                             |
| <i>β-actin</i>                | Human   | CATGTACGTTGCTATC<br>CAGGC   |                            | CTCCTTAATGTCACGCAC<br>GAT     |                             |
| <i>α-SMA</i>                  | Rat     | CCTCATGCCATCATGC<br>GTCT    |                            | CTCACGCTCAGCAGTAGT<br>CA      |                             |
| <i>β-actin</i>                | Rat     | CTCTGTGTGGATTGGT<br>GGCT    |                            | CGCAGCTCAGTAACAGTC<br>CG      |                             |
| <i>IL-6</i>                   | Mouse   | CTTCTTGGGACTGATG<br>CTGGT   |                            | CTCTGTGAAGTCTCCTCT<br>CCG     |                             |
| <i>TNFα</i>                   | Mouse   | CAGGCGGTGCCTATGT<br>CTC     |                            | CGATCACCCCGAAGTTCA<br>GTAG    |                             |
| <i>IL-1β</i>                  | Mouse   | CTGCAGCTGGAGAGT<br>GTGG     |                            | GGGGA ACTCTGCAGACTC<br>AA     |                             |
| <i>IL-1β</i>                  | Human   | ATGATGGCTTATTACA<br>GTGGCAA |                            | GTCGGAGATTCGTAGCTG<br>GA      |                             |
| <i>IL-6</i>                   | Human   | ACTCACCTCTTCAGAA<br>CGAATTG |                            | CCATCTTTGGAAGGTTCA<br>GGTTG   |                             |
| <i>TNFα</i>                   | Human   | CCTCTCTCTAATCAGC<br>CCTCTG  |                            | GAGGACCTGGGAGTAGAT<br>GAG     |                             |

**Table S5. Antibodies used in this study.**

| Primary antibodies            | Source | Provider                     | Catalog    | Application                                |
|-------------------------------|--------|------------------------------|------------|--------------------------------------------|
| HDAC9                         | Rabbit | ORIGENE                      | TA324378   | WB (1:500),<br>IHC (1:50),<br>IF (1:50)    |
| Fibronectin                   | Rabbit | ProteinTech<br>Group         | 15613-1-AP | WB (1:1000)                                |
| Vimentin                      | Rabbit | Abcam                        | ab92547    | IHC (1:100),<br>IF (1:100)                 |
| Vimentin                      | Rabbit | Cell Signaling<br>Technology | 5741       | WB (1:1000)                                |
| Alpha-smooth muscle           | Rabbit | Abcam                        | ab124964   | WB (1:2000),<br>IHC (1:100),<br>IF (1:100) |
| PCNA                          | Rabbit | ProteinTech<br>Group         | 10205-2-AP | WB (1:1000),<br>IHC (1:50),<br>IF (1:100)  |
| Collagen I                    | Rabbit | Affinity                     | AF7001     | WB (1:1000)                                |
| Collagen I                    | Rabbit | Cell Signaling<br>Technology | 72026      | IHC (1:50),<br>IF (1:50)                   |
| Collagen IV                   | Rabbit | Abcam                        | ab236640   | IHC (1:50)                                 |
| Cyclin B1                     | Mouse  | Cell Signaling<br>Technology | 4135       | IHC (1:50),<br>IF (1:50)                   |
| Cyclin B1                     | Rabbit | ProteinTech<br>Group         | 55004-1-AP | WB (1:1000)                                |
| Cyclin D1                     | Rabbit | Abcam                        | ab16663    | WB (1:1000)                                |
| Ki-67                         | Rabbit | Abcam                        | ab15580    | IF (1:50)                                  |
| Histone H3 (phospho<br>S10)   | Mouse  | Abcam                        | ab14955    | IF (1:50)                                  |
| PDGF Receptor $\beta$         | Rabbit | Cell Signaling<br>Technology | 3169       | IF (1:50)                                  |
| Alpha-smooth muscle           | Mouse  | ProteinTech<br>Group         | 67735-1-Ig | IF (1:100)                                 |
| TGF beta 1                    | Rabbit | Abcam                        | ab215715   | IHC (1:50)                                 |
| TGF beta 1                    | Rabbit | Abcam                        | ab179695   | WB (1:2000)                                |
| STAT1 (phospho S727)          | Rabbit | Abcam                        | ab109461   | WB (1:1000),<br>IHC (1:50)                 |
| Acetylated-Lysine<br>Antibody | Rabbit | Cell Signaling<br>Technology | 9441       | WB (1:1000)                                |
| STAT1                         | Mouse  | Cell Signaling<br>Technology | 9176       | IP (10 $\mu$ g),<br>WB (1:1000)            |
| STAT1                         | Rabbit | Abcam                        | ab234400   | WB (1:1000)                                |

|                                                   |        |                              |          |                           |
|---------------------------------------------------|--------|------------------------------|----------|---------------------------|
| STAT1                                             | Mouse  | Abcam                        | ab155933 | IP (10µg),<br>WB (1:1000) |
| p21                                               | Rabbit | Abcam                        | ab109199 | WB (1:1000),<br>IF (1:50) |
| STAT1 (phospho S727)                              | Rabbit | Cell Signaling<br>Technology | 9177     | IF (1:50)                 |
| HDAC3                                             | Rabbit | ABclonal                     | A2139    | WB (1:1000)               |
| HDAC7                                             | Rabbit | Abcam                        | ab166911 | WB (1:1000)               |
| HDAC8                                             | Rabbit | ABclonal                     | A5829    | WB (1:1000)               |
| F4/80                                             | Rabbit | Cell Signaling<br>Technology | 70076    | IHC (1:50)                |
| DNMT3a                                            | Rabbit | Cell Signaling<br>Technology | 3598     | WB (1:1000)               |
| STAT2                                             | Rabbit | ABclonal                     | A3588    | WB (1:1000)               |
| STAT3                                             | Rabbit | ABclonal                     | A1192    | WB (1:1000)               |
| STAT4                                             | Rabbit | ABclonal                     | A4523    | WB (1:1000)               |
| STAT5                                             | Rabbit | ABclonal                     | A5029    | WB (1:1000)               |
| STAT6                                             | Rabbit | ABclonal                     | A19120   | WB (1:1000)               |
| STAT2 (phospho Y690)                              | Rabbit | Abcam                        | ab191601 | WB (1:1000)               |
| STAT3 (phospho Tyr705)                            | Rabbit | Cell Signaling<br>Technology | 9145     | WB (1:1000)               |
| STAT4 (phospho Y690)                              | Mouse  | Santa Cruz<br>Biotechnolog   | sc-28296 | WB (1:500)                |
| STAT5 (phospho Tyr694)                            | Rabbit | Cell Signaling<br>Technology | 4322     | WB (1:500)                |
| STAT6 (phospho Y641)                              | Rabbit | ABclonal                     | AP0456   | WB (1:500)                |
| Mouse IgG1 Isotype<br>Control                     | Mouse  | Cell Signaling<br>Technology | 5415     | IP (10µg)                 |
| Mouse Anti-rabbit IgG                             | Mouse  | Cell Signaling<br>Technology | 5127     | WB (1:2000)               |
| Goat Anti-Rabbit IgG<br>(H+L) HRP                 | Goat   | Abways<br>Technology         | AB0101   | WB (1:10000)              |
| Goat Anti-Mouse IgG<br>(H+L) HRP                  | Goat   | Abways<br>Technology         | AB0102   | WB (1:10000)              |
| Goat Anti-Rabbit IgG<br>H&L (Alexa Fluor®<br>594) | Goat   | Abcam                        | ab150080 | IF (1:200)                |
| Goat Anti-Mouse IgG<br>H&L (Alexa Fluor®<br>594)  | Goat   | Abcam                        | ab150116 | IF (1:200)                |
| Goat Anti-Rabbit IgG<br>H&L (Alexa Fluor®<br>488) | Goat   | Abcam                        | ab150077 | IF (1:200)                |

|                |        |                            |           |              |
|----------------|--------|----------------------------|-----------|--------------|
| GAPDH          | Rabbit | Abways<br>Technology       | AB0037    | WB (1:10000) |
| $\beta$ -actin | Rabbit | Abways<br>Technology       | AB0035    | WB (1:10000) |
| AQP1           | Mouse  | Abcam                      | ab9566    | IF (1:100)   |
| THP            | Mouse  | Santa Cruz<br>Biotechnolog | sc-271022 | IF (1:100)   |



## Supplementary figures

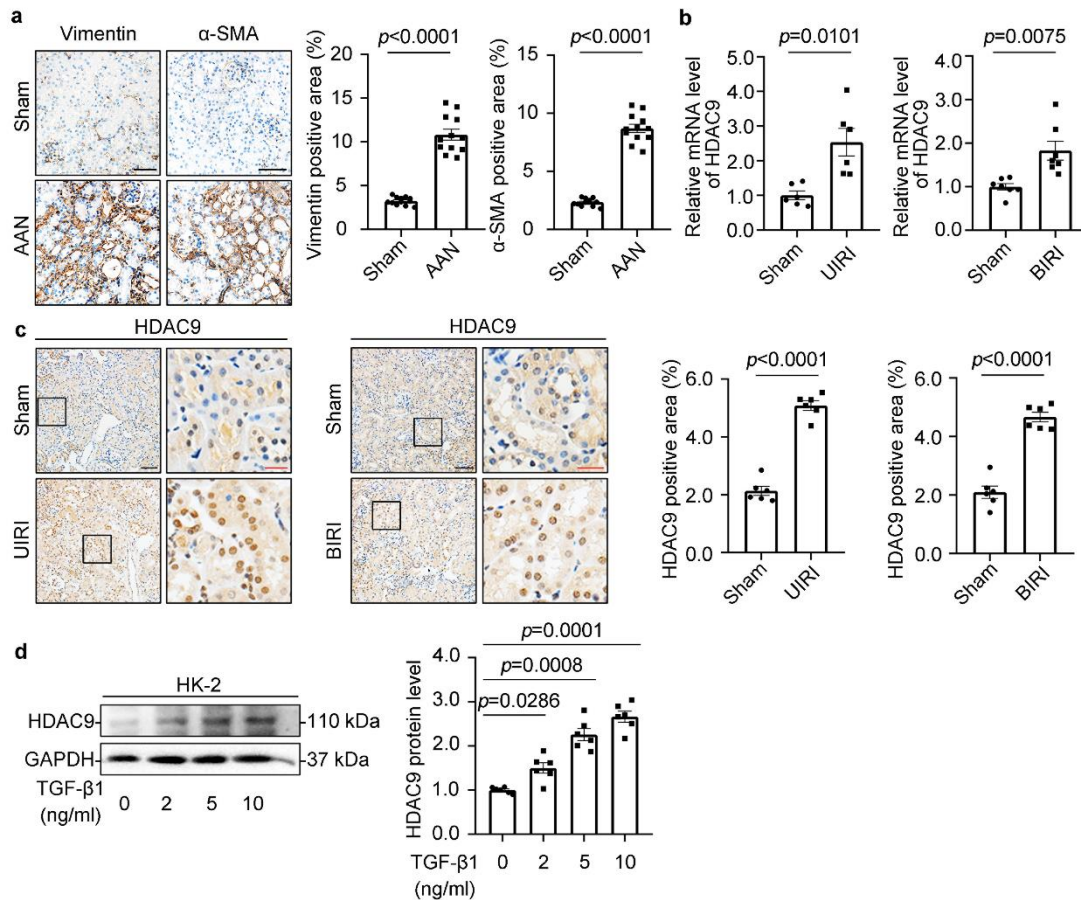

**Supplementary Figure S1. HDAC9 was significantly increased in tubular epithelial cells.** **a.** Photomicrographs and quantifications of Vimentin and  $\alpha$ -SMA in kidney from AAN mice. Scale bar: black = 50  $\mu$ m. (n = 12 mice per group). **b.** Relative mRNA level of *HDAC9* in the cortex of kidney from UIRI (n = 6 mice per group) and BIRI (n = 7 mice per group) mice. **c.** Photomicrographs and quantifications showing the expression of HDAC9 in the cortex of kidney from UIRI (n = 6 mice per group) and BIRI (n = 6 mice per group) mice. Bar: black = 50  $\mu$ m; red = 20  $\mu$ m. **d.** Representative Western blot gel documents and summarized data showing the relative protein levels of HDAC9 in human tubule epithelial cells (HK-2) with TGF- $\beta$ 1 treatment for 48 h. (n = 6 biologically independent experiments). Data are expressed as mean  $\pm$  SEM (a-d). Two-tailed Student's unpaired t test analysis (a-c). One-way ANOVA followed by Tukey's post-test (d). Source data are provided as a Source Data file.

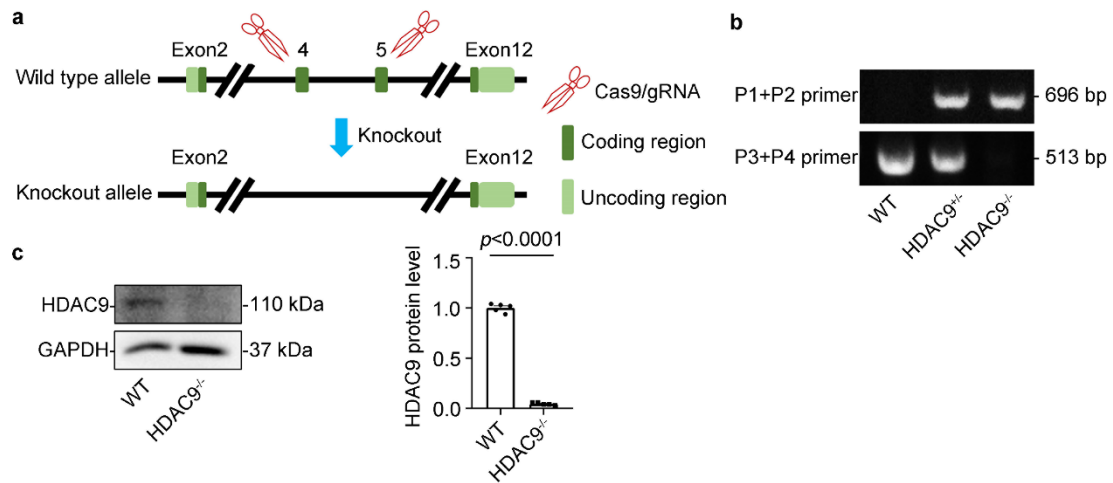

**Supplementary Figure S2. Establishment of *HDAC9* knockout (*HDAC9*<sup>-/-</sup>) mice. a.** Scheme for *HDAC9* knockout mice. **b.** Genotyping was confirmed by tail preparation and PCR at 2 weeks of age. **b** was repeated five times independently with similar results. **c.** Representative Western blot gel documents and summarized data showing the relative protein levels of HDAC9 in the cortex of kidney from *HDAC9*<sup>-/-</sup> mice. (n = 5 mice per group). Data are expressed as mean ± SEM (c). Two-tailed Student's unpaired t test analysis (c). Source data are provided as a Source Data file.

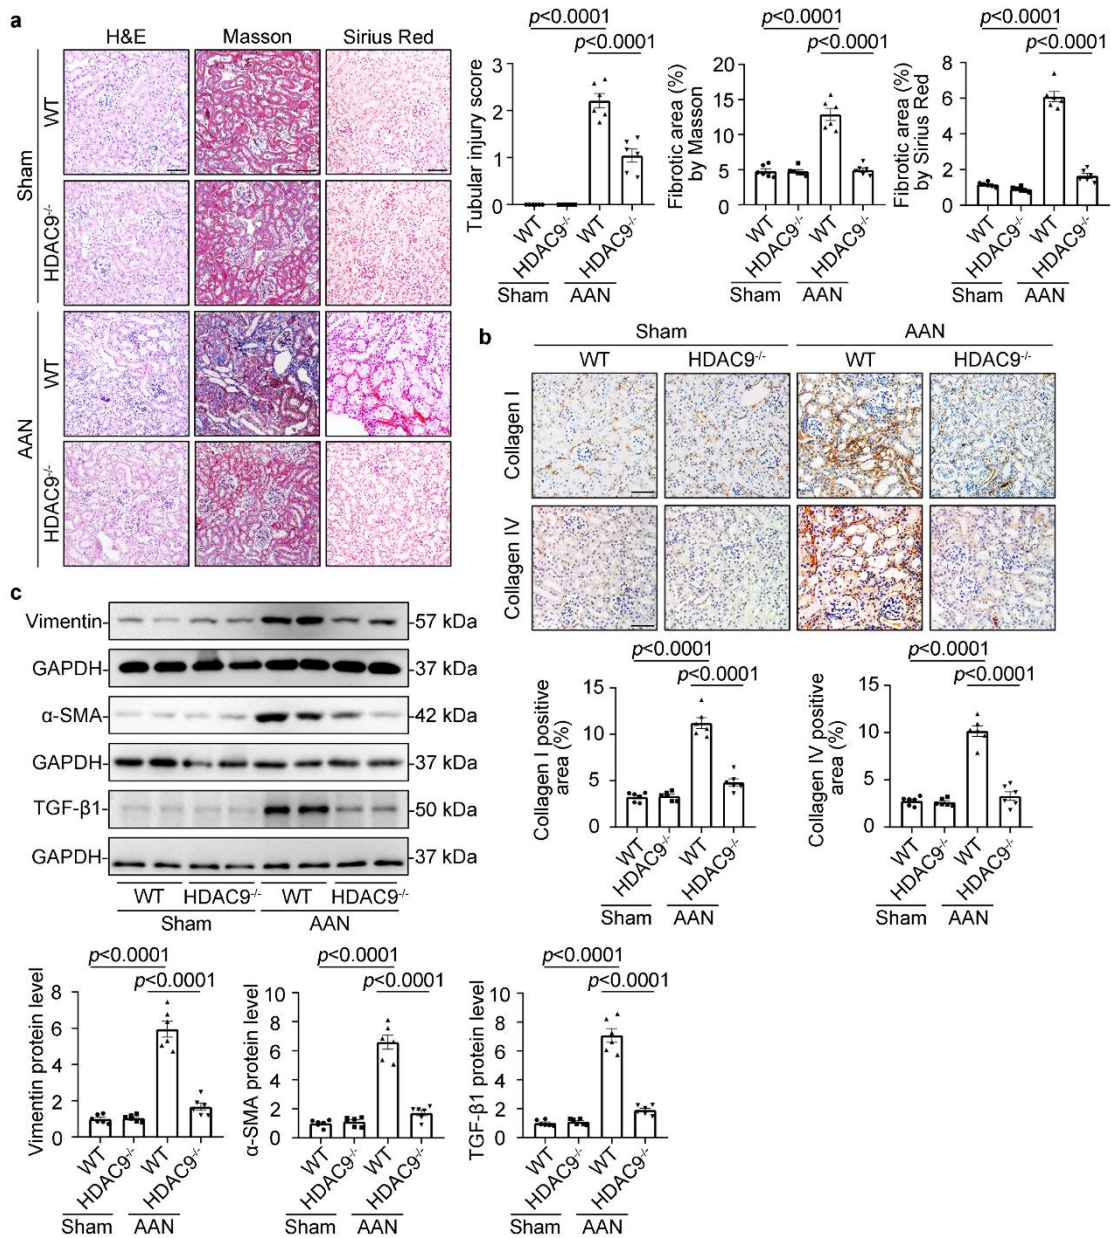

**Supplementary Figure S3. *HDAC9* deficiency attenuated kidney fibrosis.** **a.** H&E staining, Masson's trichrome staining and Sirius Red staining were performed to assess the kidney injury and fibrosis in different groups. Scale bar: black = 50  $\mu$ m. (n = 6 mice per group). **b.** Photomicrographs and quantifications showing the expression of collagen I and collagen IV in kidney from different groups of mice. Scale bar: black = 50  $\mu$ m. (n = 6 mice per group). **c.** Representative Western blot gel documents and summarized data showing the relative protein levels of Vimentin,  $\alpha$ -SMA and TGF- $\beta$ 1 in the cortex of kidney from different groups of mice. (n = 6 mice per group). Data are expressed as mean  $\pm$  SEM (a-c). Two-way ANOVA followed by Tukey's post-test (a-c). Source data are provided as a Source Data file.

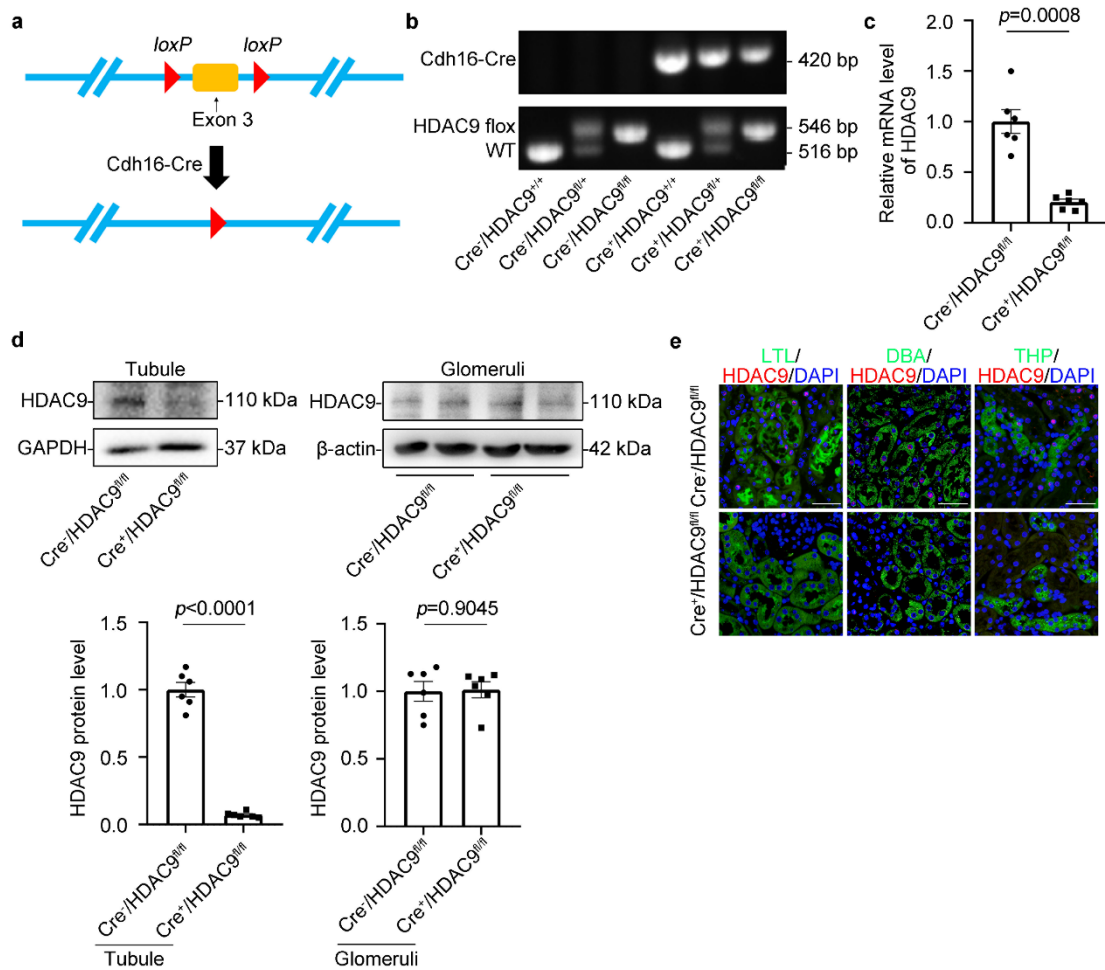

**Supplementary Figure S4. Establishment of tubule-specific *HDAC9* knockout (*Cre<sup>+</sup>/HDAC9<sup>fl/fl</sup>*) mice.** **a.** Generation of conditional knockout mice in which *HDAC9* is specifically ablated renal tubular cells by using *Cre-LoxP* recombination system. Exon 3 is deleted upon *Cdh16-Cre*-mediated recombination. **b.** Genotyping was confirmed by tail preparation and PCR at 2 weeks of age. This experiment was repeated five times independently with similar results. **c.** Relative mRNA level of *HDAC9* in the cortex of kidney from *Cre<sup>+</sup>/HDAC9<sup>fl/fl</sup>* mice. (n = 6 mice per group) **d.** Representative Western blot gel documents and summarized data showing the relative protein levels of *HDAC9* in isolated tubule or glomeruli from *Cre<sup>+</sup>/HDAC9<sup>fl/fl</sup>* mice. (n = 6 mice per group). **e.** Photomicrographs showed that *HDAC9* was deleted in renal tubules, including proximal tubule. Lotus tetragonolobus lectin (LTL) was used as a proximal tubular marker. Tamm-Horsfall glycoprotein (THP) was used as a marker for ascending loop of Henle; dolichos biflorus agglutinin (DBA) was used as a marker for collecting duct. Scale bar: white = 20  $\mu$ m. This experiment was repeated three times independently with similar results. Data are expressed as mean  $\pm$  SEM (c and d). Two-tailed Student's unpaired t test analysis (c-d). Source data are provided as a Source Data file.

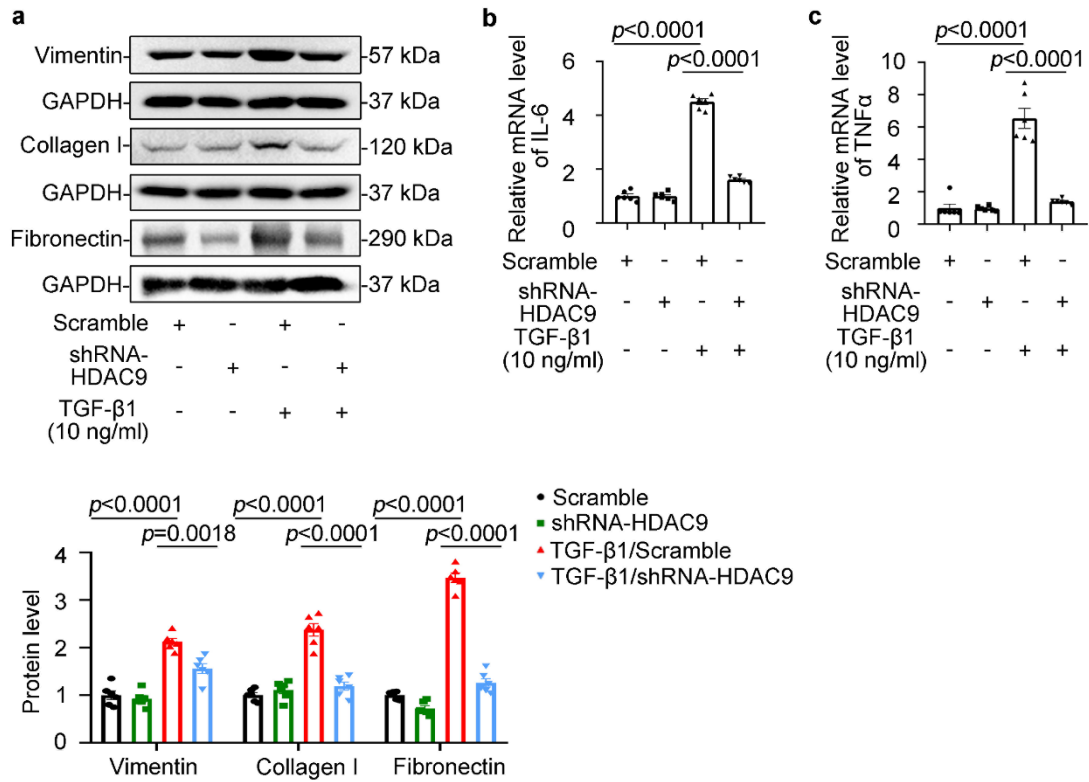

**Supplementary Figure S5. HDAC9 knockdown reduced the expression of markers associated with fibrosis and proinflammatory mediators in HK-2 with TGF-β1 treatment.** **a.** Representative Western blot gel documents and summarized data showing the relative protein levels of Vimentin, Collagen I and Fibronectin in HK-2 with TGF-β1 treatments. (n = 6 biologically independent experiments). **b and c.** Relative mRNA level of *IL-6* and *TNFα* in HK-2 with different treatments. (n = 6 biologically independent experiments). Data are expressed as mean ± SEM (a-c). Two-way ANOVA followed by Tukey's post-test (a-c). Source data are provided as a Source Data file.



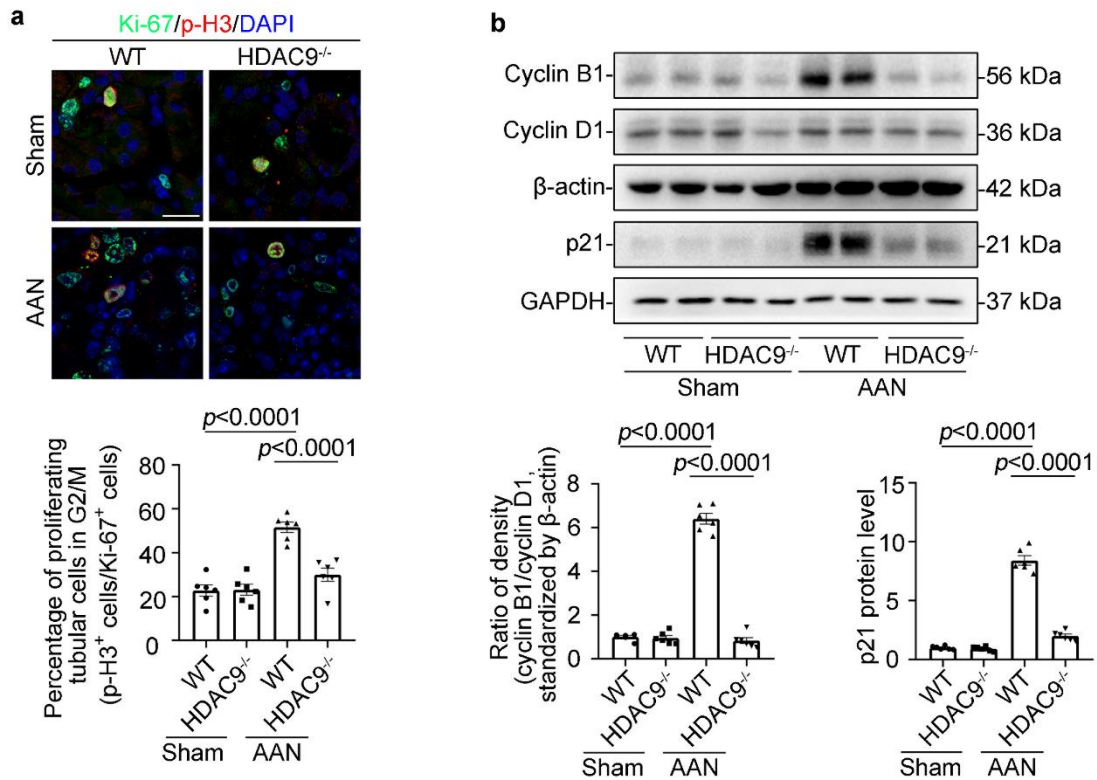

**Supplementary Figure S6. *HDAC9* deficiency inhibited tubular epithelial cell G2/M arrest.** **a.** Representative photomicrographs of coimmunostaining with antibodies to Ki-67 (anti-Ki-67) and p-H3 (anti-p-H3) on kidneys and the percentage of Ki-67<sup>+</sup> p-H3<sup>+</sup> cells among total Ki-67<sup>+</sup> tubular cells in different groups. Scale bar: white = 10  $\mu$ m. (n = 6 mice per group). **b.** Representative Western blot gel documents and summarized data showing the ratio of cyclin B1 to cyclin D1 densities standardized to  $\beta$ -actin and the relative protein levels of p21 in the cortex of kidney from different groups of mice. (n = 6 mice per group). Data are expressed as mean  $\pm$  SEM (a and b). Two-way ANOVA followed by Tukey's post-test (a and b). Source data are provided as a Source Data file.

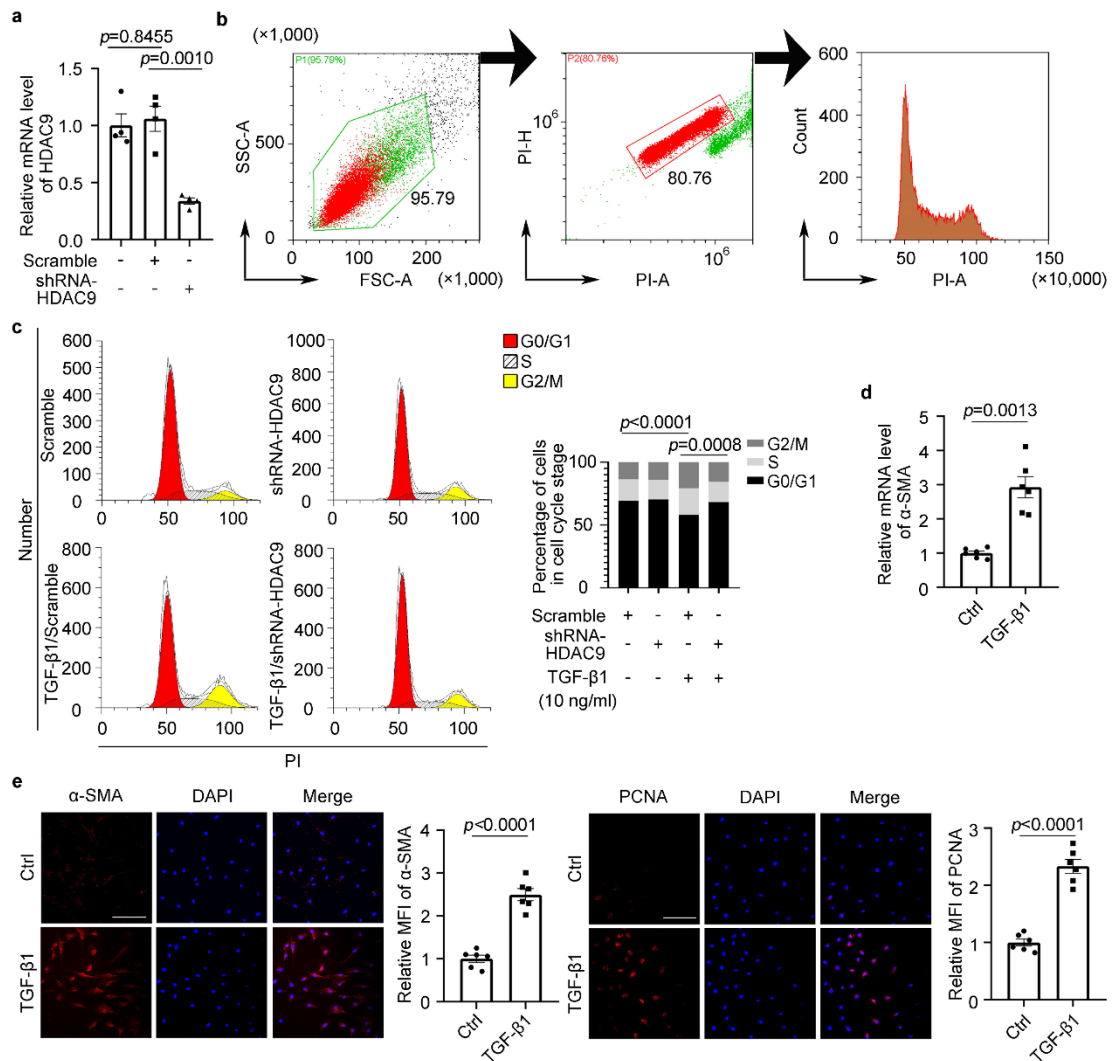

**Supplementary Figure S7. HDAC9 contributed to epithelial cell cycle arrest in G2/M and activation of fibroblasts.** **a.** The relative mRNA level of *HDAC9* in HK-2 with *HDAC9*-lentivirus transfection. (n = 4 biologically independent experiments). **b.** Representative gating strategy for analyzing the G2/M cell cycle arrest. **c.** Cell cycle analysis by flow cytometry for HK-2 in different groups. (n = 6 biologically independent experiments). Red: G0/G1; yellow: G2/M. **d.** Relative mRNA level of  $\alpha$ -SMA in NRK-49F with different treatments. (n = 6 biologically independent experiments). **e.** Photomicrographs and quantifications showing the expression of  $\alpha$ -SMA (red) and PCNA (red) in NRK-49F with TGF- $\beta$ 1 (5 ng/ml) treatment for 24h. Scale bar: white = 100  $\mu$ m. (n = 6 biologically independent experiments). Data are expressed as mean  $\pm$  SEM (a, c, d, e). Two-way ANOVA followed by Tukey's post-test (a and c). Two-tailed Student's unpaired t test analysis (d and e). Source data are provided as a Source Data file.

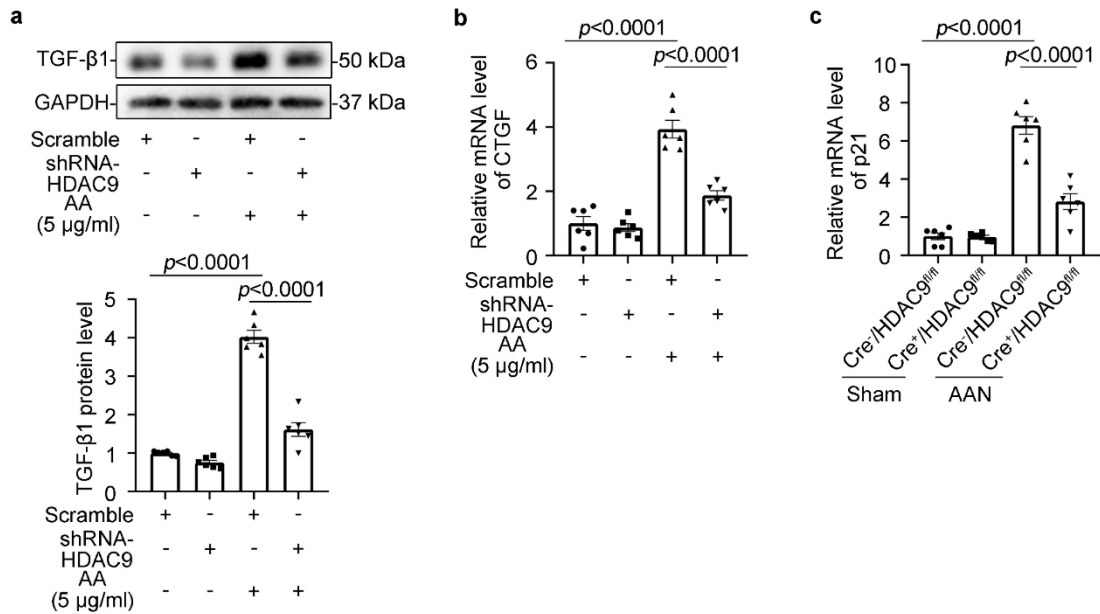

**Supplementary Figure S8. *HDAC9* upregulated the expression of TGF-β1, CTGF and p21.** **a.** Representative Western blot gel documents and summarized data showing the relative protein levels of TGF-β1 in HK-2 with AA treatment. (n = 6 biologically independent experiments). **b.** Relative mRNA level of *CTGF* in HK-2 with different treatments. (n = 6 biologically independent experiments). **c.** Relative mRNA level of *p21* in isolated tubules from different groups of mice. (n = 6 mice per group). Data are expressed as mean ± SEM (a-c). Two-way ANOVA followed by Tukey's post-test (a-c). Source data are provided as a Source Data file.



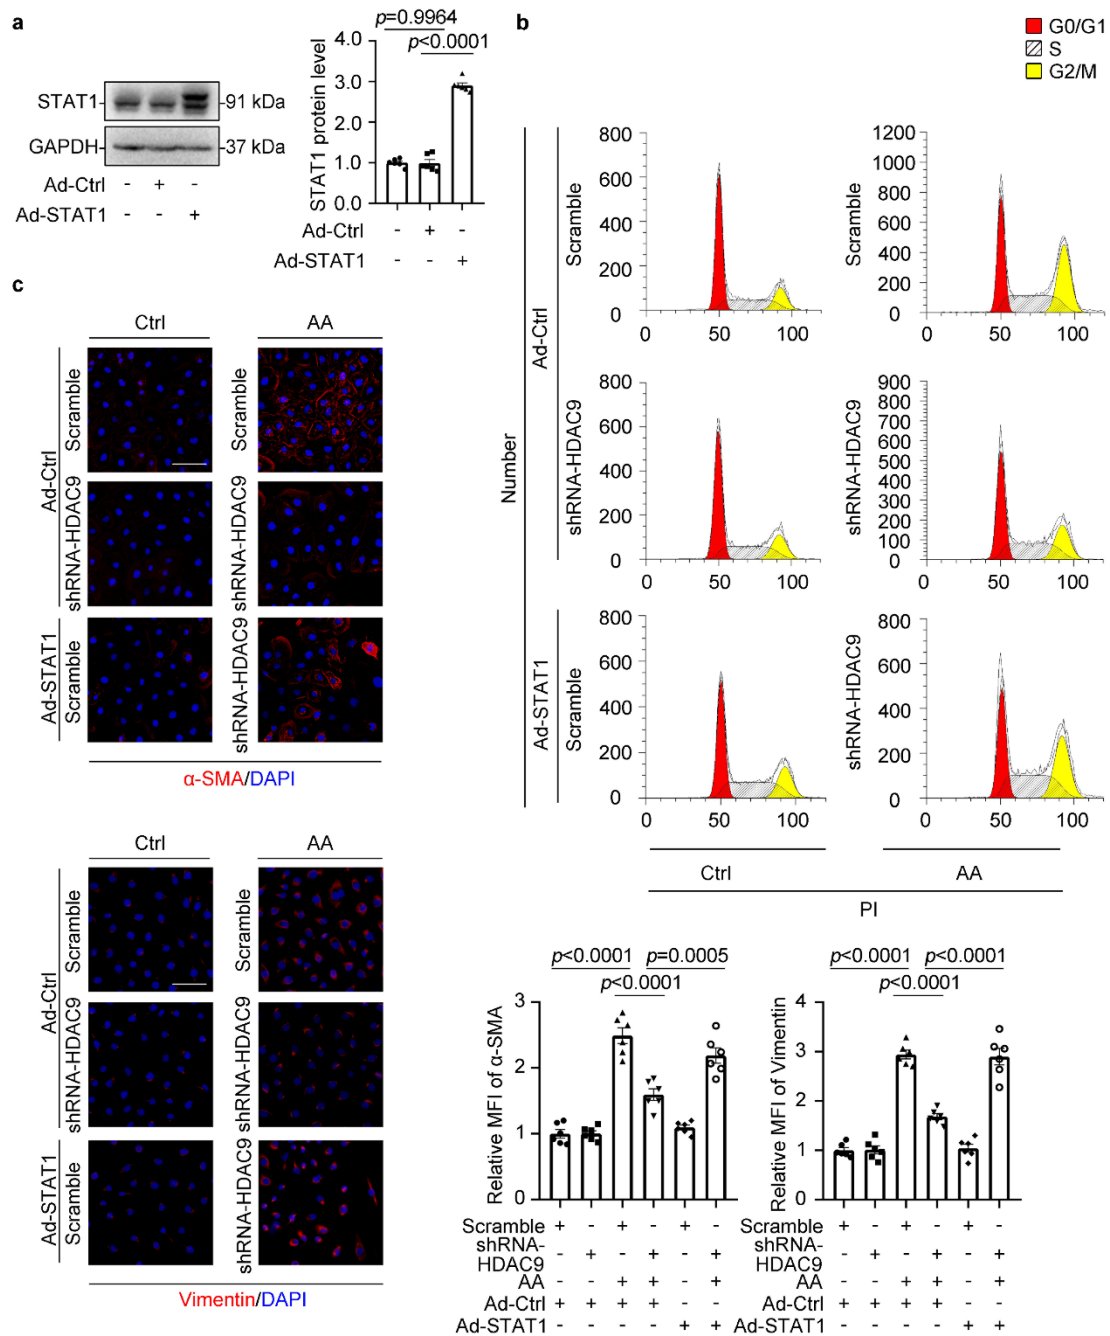

**Supplementary Figure S9. STAT1 was involved in HDAC9-mediated fibrotic effect.** **a.** Representative Western blot gel documents and summarized data showing the relative protein level of STAT1 in HK-2 with STAT1-adenovirus transfection. (n = 6 biologically independent experiments). **b.** Cell cycle analysis by flow cytometry for HK-2 in different groups. Red: G0/G1; yellow: G2/M. **c.** Photomicrographs and quantifications showing the relative protein levels of  $\alpha$ -SMA, and Vimentin in HK-2 with different treatments. Scale bar: white = 50  $\mu$ m. (n = 6 biologically independent experiments). Data are expressed as mean  $\pm$  SEM (a and c). Two-way ANOVA followed by Tukey's post-test (a and c). Source data are provided as a Source Data file.

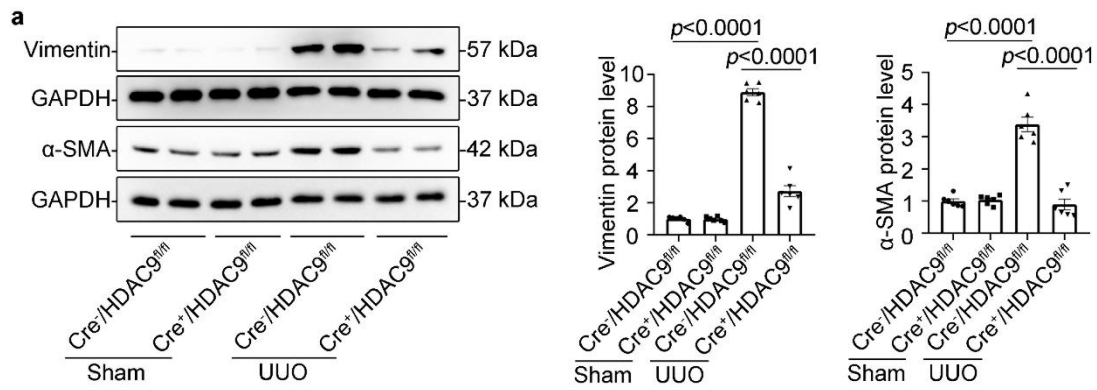

**Supplementary Figure S10. Tubule-specific deletion of *HDAC9* reduced the expression of Vimentin and  $\alpha$ -SMA.** **a.** Representative Western blot gel documents and summarized data showing the relative protein levels of Vimentin and  $\alpha$ -SMA in cortex of kidney from different groups of mice. (n = 6 mice per group). Data are expressed as mean  $\pm$  SEM (a). Two-way ANOVA followed by Tukey's post-test (a). Source data are provided as a Source Data file.

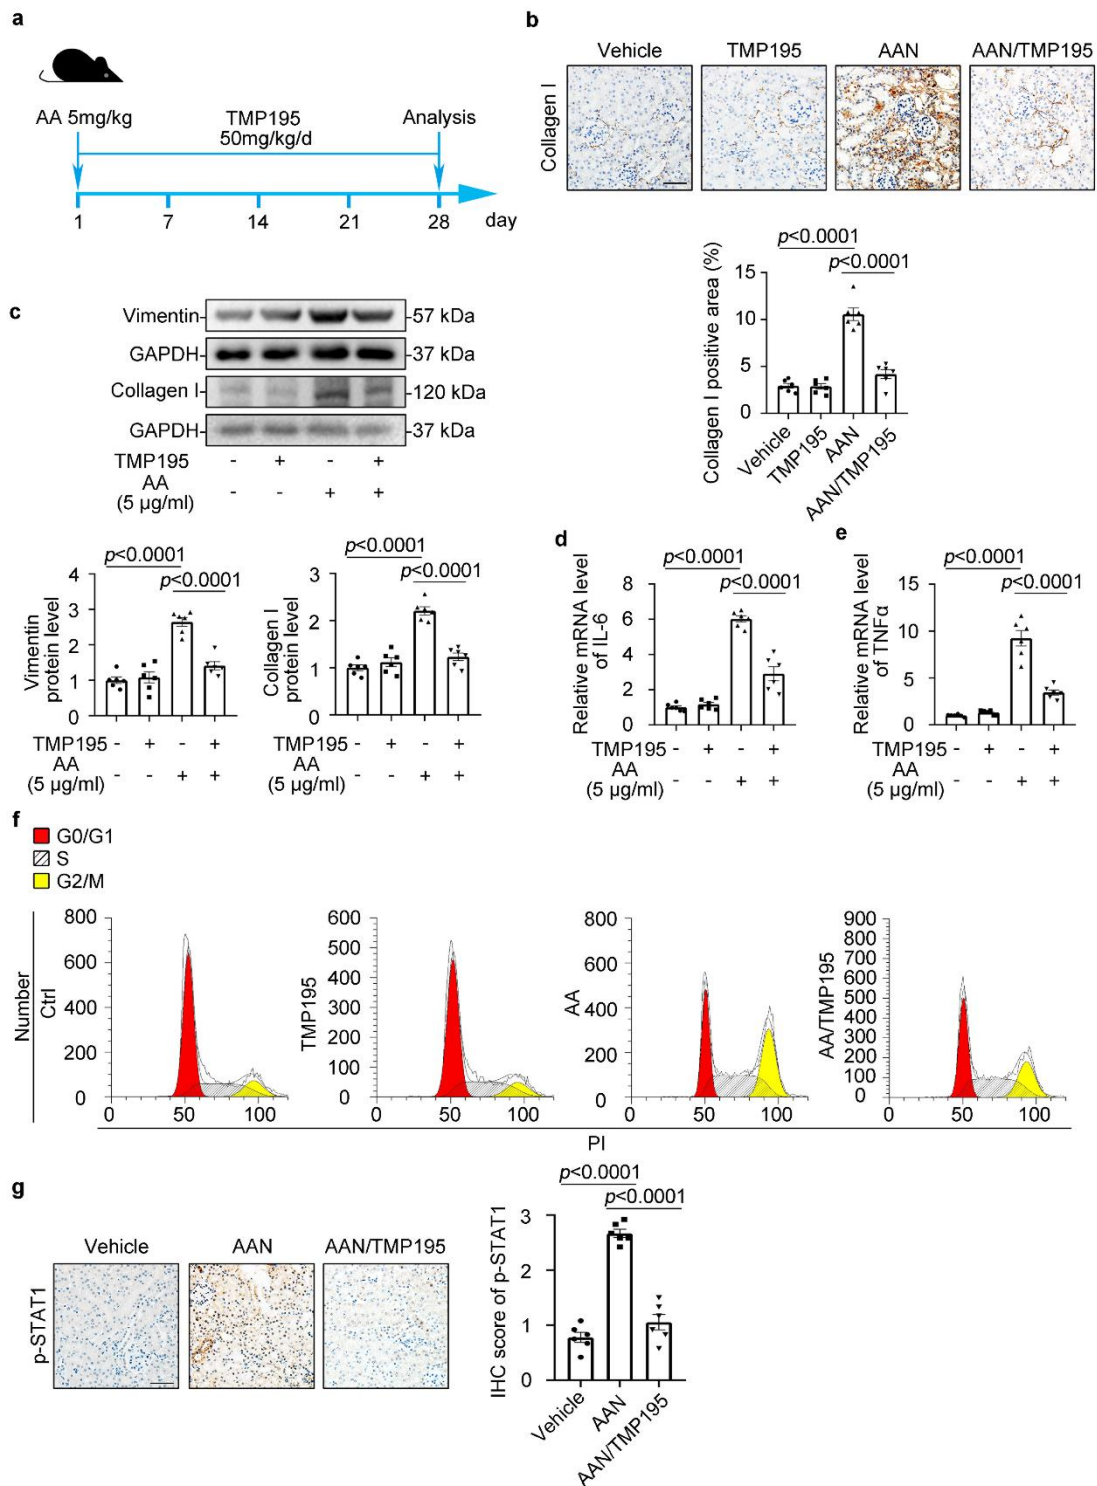

**Supplementary Figure S11. TMP195 attenuated kidney fibrosis and inhibited G2/M phase arrest in TECs. a.** A schematic diagram showing TMP195 treatment in AAN mice. **b.** Photomicrographs and quantifications showing the expression of collagen I in kidney from different groups of mice. Scale bar: black = 50 µm. (n = 6 mice per group). **c.** Representative Western blot gel documents and summarized data showing the relative protein levels of Vimentin and Collagen I in HK-2 with AA treatments. (n = 6 biologically independent experiments). **d and e.** Relative mRNA

level of *IL-6* and *TNF $\alpha$*  in HK-2 with different treatments. (n = 6 biologically independent experiments). **f.** Cell cycle analysis by flow cytometry for HK-2 in different groups. **g.** Photomicrographs and quantifications showing the protein levels of p-STAT1 in kidney from different groups of mice. Scale bar: black = 50  $\mu$ m. (n = 6 mice per group). Data are expressed as mean  $\pm$  SEM (b, c, d, e and g). Two-way ANOVA followed by Tukey's post-test (b-e and g). Source data are provided as a Source Data file.

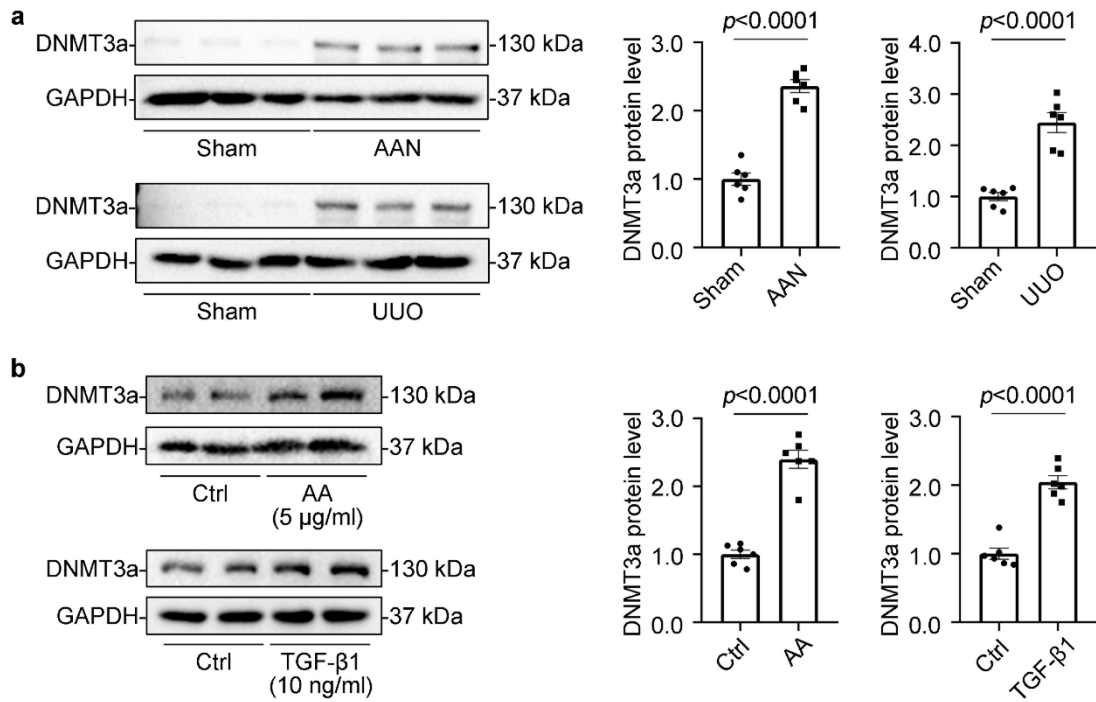

**Supplementary Figure S12. DNMT3a was increased in fibrotic kidneys and HK-2 with AA or TGF- $\beta$ 1 treatment.** **a.** Representative Western blot gel documents and summarized data showing the relative protein levels of DNMT3a in the cortex of kidney from AAN or UUO mice. (n = 6 mice per group). **b.** Representative Western blot gel documents and summarized data showing the relative protein levels of DNMT3a in HK-2 with different treatments. (n = 6 biologically independent experiments). Data are expressed as mean  $\pm$  SEM (a and b). Two-tailed Student's unpaired t test analysis (a and b). Source data are provided as a Source Data file.
